# Supplementary material for: ONIOM meets xtb: efficient, accurate, and robust multi-layer simulations across the periodic table
Source: Royal Society of Chemistry journal article supplement (doi:10.1039/d3cp02178e), 2023-01-01
Supplement: d3cp02178e2.pdf [file d3cp02178e2.pdf]

# **Electronic Supplementary Information: ONIOM meets xtb: Efficient, Accurate, and Robust Multi-Layer Simulations Across the Periodic Table**

Christoph Plett,<sup>a</sup> Abylay Katbashev,<sup>a</sup> Sebastian Ehlert,<sup>b</sup>  
Stefan Grimme,<sup>\*a</sup> and Markus Bursch<sup>\*c</sup>

May 12, 2023

<sup>a</sup> Mulliken Center for Theoretical Chemistry, Universität Bonn, Berlingstr. 4, 53115 Bonn, Germany. E-mail:  
*grimme@thch.uni-bonn.de*

<sup>b</sup> Microsoft Research AI4Science, Evert van de Beekstraat 254, 1118 CZ Schiphol, Netherlands.

<sup>c</sup> Max-Planck-Institut für Kohlenforschung, Kaiser-Wilhelm-Platz 1, 45470 Mülheim an der Ruhr, Germany. E-mail:  
*bursch@kofo.mpg.de*

# Contents

|          |                                       |          |
|----------|---------------------------------------|----------|
| <b>1</b> | <b>Implementation</b>                 | <b>3</b> |
| 1.1      | Element-specific parameters . . . . . | 3        |
| 1.2      | Derivatives for Jacobian . . . . .    | 3        |
| 1.2.1    | Constant . . . . .                    | 3        |
| 1.2.2    | Dynamic . . . . .                     | 3        |
| <b>2</b> | <b>Detailed results</b>               | <b>4</b> |
| 2.1      | Molecular structures . . . . .        | 4        |
| 2.1.1    | UiO-66 . . . . .                      | 4        |
| 2.1.2    | DALTES . . . . .                      | 5        |
| 2.2      | Electronic energies . . . . .         | 6        |

# 1 Implementation

## 1.1 Element-specific parameters

Table 1: Element-specific parameters used to calculate the static scaling factor  $k$  in the ONIOM implementation of *xtb*. The average bond distances  $d^{ONIOM}$  are given in Å.

| Elements | H     | C     | O     | N     | P     | S     |
|----------|-------|-------|-------|-------|-------|-------|
| H        | 0.740 | 1.084 | 0.964 | 1.024 | 1.414 | 1.389 |
| C        | -     | 1.528 | 1.430 | 1.475 | 1.860 | 1.750 |
| O        | -     | -     | 1.450 | 1.360 | 1.750 | 1.500 |
| N        | -     | -     | -     | 1.470 | 1.770 | 1.650 |

## 1.2 Derivatives for Jacobian

The general equation for the Link atom coordinates is given by:

$$\vec{R}_{LA} = \vec{R}_{inner} + k(\vec{R}_{outer} - \vec{R}_{inner}) \quad (1)$$

Herein,  $k$  factor is defined as:

$$k = \frac{d_1}{d_2} \quad (2)$$

where  $d_1$  is the distance between the inner region atom and a hydrogen atom that is taken as corresponding parameter from Table 1.  $d_2$  is the distance between the inner region and outer region atoms which  $d_2$  can be chosen to be either constant or equal to the actual distances in molecular systems.

### 1.2.1 Constant

If  $d_2$  is constant, the differentiation of Equation (1) with respect to the real coordinates of the full system is given by:

$$\frac{\delta R_{LA,i}}{\delta R_{inner,i}} = (1 - k), \text{ with } i=x,y,z \quad (3)$$

$$\frac{\delta R_{LA,i}}{\delta R_{outer,i}} = k \quad (4)$$

### 1.2.2 Dynamic

If  $d_2$  is set to be equal to the actual distance in the system, it can be defined as

$$d_2 = \sqrt{\sum_{i=1}^3 (R_{outer,i} - R_{inner,i})^2}. \quad (5)$$

Thus, the derivatives of Equation (1) changes to

$$\frac{\delta R_{LA,i}}{\delta R_{inner,i}} = 1 - k \left( 1 - \frac{(R_{outer,i} - R_{inner,i})^2}{d_2^2} \right), \quad (6)$$

and

$$\frac{\delta R_{LA,i}}{\delta R_{outer,i}} = k \frac{\sum_{j \neq i}^3 (R_{outer,j} - R_{inner,j})^2}{d_2^2}. \quad (7)$$

## 2 Detailed results

### 2.1 Molecular structures

#### 2.1.1 UiO-66

Table 2: Comparison of the heavy atom root-mean-square deviations (hRMSDs) (vs X-ray) and the wall-times (on 14 cores) for the cut-out of the UiO-66 metal-organic framework (MOF) with a total size of 484 atoms optimized with different GFN and DFT methods, as well as their ONIOM combinations. 1, 3, and 6 are sizes of the inner regions used for the corresponding ONIOM calculations.

| Methods                          | size | hRMSD(vs X-ray) / Å | Wall-time (14cores) |
|----------------------------------|------|---------------------|---------------------|
| GFN-FF                           | full | 0.335               | 5s                  |
| GFN2-xTB//GFN-FF                 | 1    | 0.290               | 12s                 |
|                                  | 3    | 0.233               | 49s                 |
|                                  | 6    | 0.115               | 1m 54s              |
| TPSS-D4/def2-SVP//GFN-FF         | 1    | 0.288               | 52m                 |
|                                  | 3    | 0.213               | 5h 55m              |
|                                  | 6    | 0.025               | 11h 1m              |
| r <sup>2</sup> SCAN-3c//GFN-FF   | 1    | 0.292               | 2h 21m              |
|                                  | 3    | 0.219               | 12h 50m             |
|                                  | 6    | 0.025               | 20h 57m             |
| $\omega$ B97X-3c//GFN-FF         | 1    | 0.291               | 16h 16m             |
|                                  | 3    | 0.212               | 113h 19m            |
|                                  | 6    | 0.031               | 202h 51m            |
| GFN2-xTB                         | full | 0.156               | 3m                  |
| TPSS-D4/def2-SVP//GFN2-xTB       | 1    | 0.155               | 1h 30m              |
|                                  | 3    | 0.119               | 6h 1m               |
|                                  | 6    | 0.059               | 10h 45m             |
| r <sup>2</sup> SCAN-3c//GFN2-xTB | 1    | 0.161               | 3h 31m              |
|                                  | 3    | 0.124               | 19h 22m             |
|                                  | 6    | 0.054               | 18h 20m             |
| $\omega$ B97X-3c//GFN2-xTB       | 1    | 0.158               | 31h 35m             |
|                                  | 3    | 0.126               | 169h 59m            |
|                                  | 6    | 0.069               | 334h 32m            |
| TPSS-D4/def2-SVP                 | full | 0.031               | 46h 9m              |
| r <sup>2</sup> SCAN-3c           | full | 0.030               | 190h 38m            |
| $\omega$ B97X-3c                 | full | -                   | -                   |

## 2.1.2 DALTES

Table 3: hRMSD (vs.X-Ray) and wall time values (on 28 cores) of the geometry optimizations of the DALTES polyhedron with different QC methods, ordered according to the increasing computing time.

| Methods                 | hRMSD        | Wall time      |
|-------------------------|--------------|----------------|
| GFN-FF                  | 0.315        | 3s             |
| GFN2-xTB                | 0.178        | 2m             |
| <b>TPSS-D4/def2-SVP</b> | <b>0.143</b> | <b>15h 42m</b> |
| TPSS-D4/def2-mSVP       | 0.140        | 37h 18m        |
| PBEh-3c                 | 0.167        | 51h 10m        |
| B97-3c                  | 0.162        | 73h 55m        |
| r <sup>2</sup> SCAN-3c  | 0.152        | 131h 40m       |
| TPSS-D4/def2-TZVP       | 0.153        | 147h 45m       |

## 2.2 Electronic energies

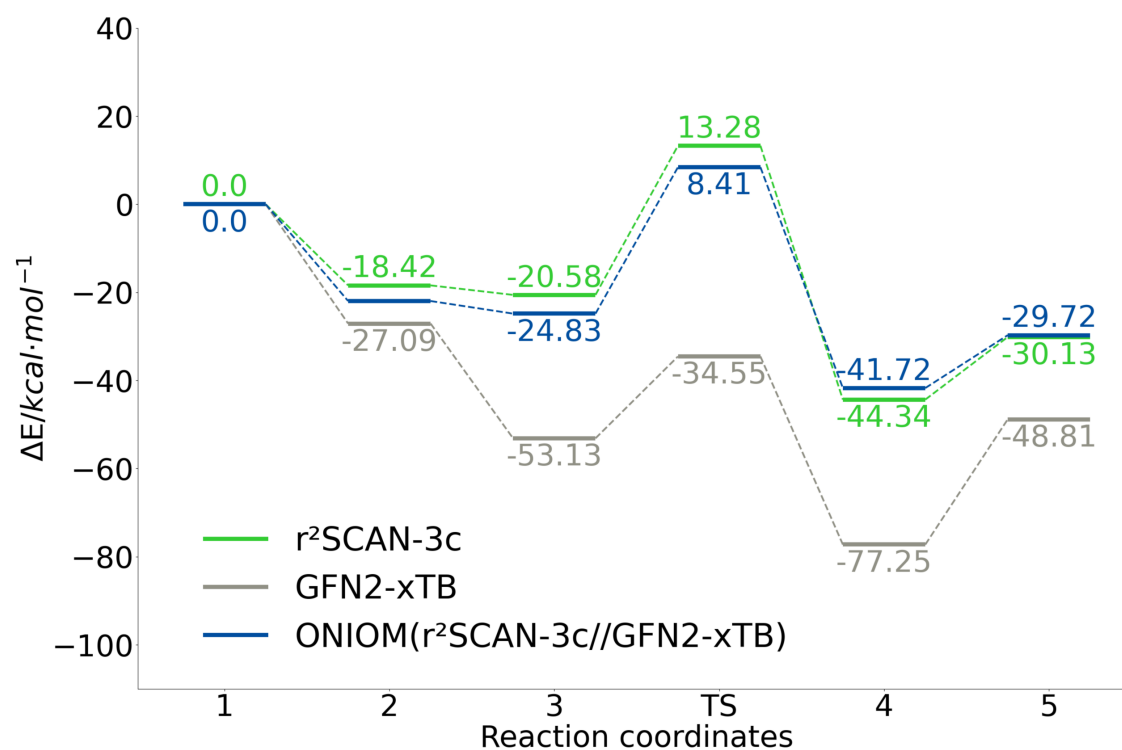

Figure 1: The relative potential energy curve of the cyanosilylation reaction computed with r<sup>2</sup>SCAN-3c, GFN2-xTB, and their r<sup>2</sup>SCAN-3c//GFN2-xTB ONIOM combination with the TPSS-D4/def2-SVP optimized geometries implicitly solvated in toluene.

Table 4: The cyanosilylation relative reaction energies at the DALTES dirhodium metal node calculated with r<sup>2</sup>SCAN-3c, TPSS-D4/def2-SVP and their ONIOM combinations with GFN2-xTB with the TPSS-D4/def2-SVP optimized geometries. The individual values are given in kcal·mol<sup>-1</sup>.

| Methods                          | Solvation model | 1    | 2      | 3      | TS     | 4      | 5      |
|----------------------------------|-----------------|------|--------|--------|--------|--------|--------|
| TPSS-D4/def2-SVP                 | COSMO           | 0.00 | -25.75 | -30.78 | 1.52   | -51.88 | -28.99 |
|                                  | GBSA            | 0.00 | -28.52 | -33.98 | -3.49  | -51.39 | -25.98 |
|                                  | ddCOSMO         | 0.00 | -28.44 | -32.84 | -2.04  | -47.80 | -28.15 |
| r <sup>2</sup> SCAN-3c//GFN2-xTB | COSMO/ddCOSMO   | 0.00 | -25.69 | -36.56 | -7.05  | -43.54 | -36.85 |
|                                  | COSMO           | 0.00 | -18.42 | -20.58 | 13.28  | -44.34 | -30.13 |
|                                  | GBSA            | 0.00 | -20.28 | -24.20 | 8.73   | -43.54 | -25.78 |
| r <sup>2</sup> SCAN-3c//GFN2-xTB | ddCOSMO         | 0.00 | -21.97 | -24.89 | 8.41   | -41.72 | -29.78 |
|                                  | COSMO/ddCOSMO   | 0.00 | -27.36 | -27.58 | 3.29   | -60.00 | -37.12 |
|                                  | COSMO           | 0.00 | -27.09 | -53.13 | -34.55 | -77.25 | -48.81 |
